# Supplementary material for: A dose-response based model for statistical analysis of chemical genetic interactions in CRISPRi libraries
Source: PubMed Central journal article supplement (PMC10418283; doi:10.1101/2023.08.03.551759), 2023-08-05
Supplement: NIHPP2023.08.03.551759v1-supplement-1.pdf [file NIHPP2023.08.03.551759v1-supplement-1.pdf]

894

## 895 Supporting Information

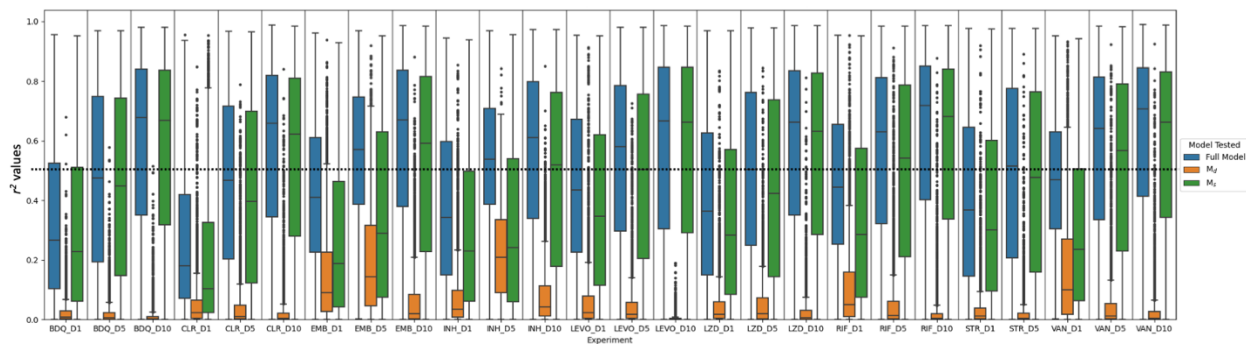

896

897 **S1 Fig. Evaluation sgRNA strength and log concentration as predictors of CRISPRi-DR model through**  
898 **comparison of distribution of  $r^2$  values of full (CRISPRi-DR) and ablated ( $M_s$  and  $M_d$ ) models for each**  
899 **gene in each experiment.**

900 The horizontal line is where  $r^2 = 0.5$ . The average  $r^2$   $M_s$  model for all genes across all the experiments is  
901 0.42, the average  $r^2$  for the  $M_d$  model is 0.07. This alongside the Log-likelihood tests indicate sgRNA  
902 strength is the more significant predictor. However, the full CRISPRi-DR model outperforms both  $M_d$  and  
903  $M_s$  (average  $r^2$  is 0.50) indicating the inclusion of both sgRNA strength and log concentration is needed  
904 for accurate assessment of significant sgRNA depletion in a gene in a condition.

905

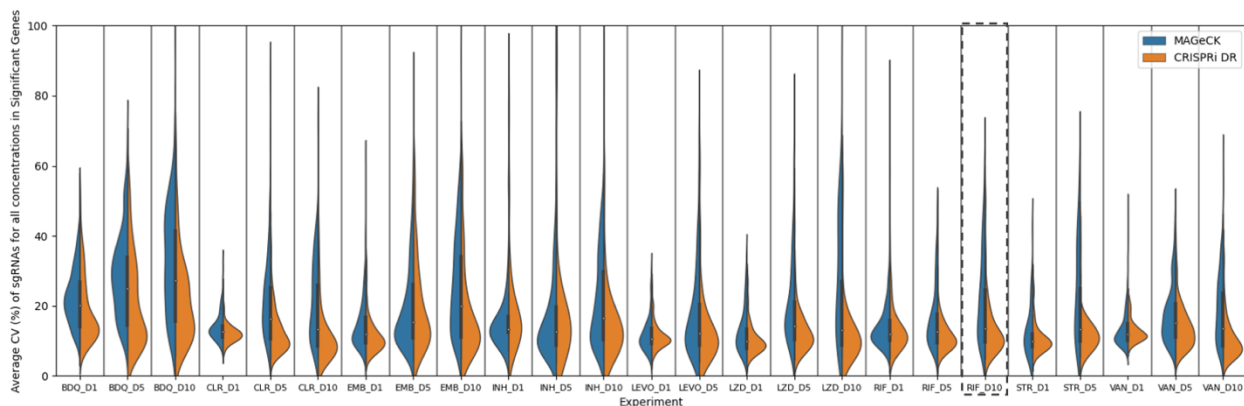

906

907 **S2 Fig. Distribution of average CV of sgRNAs in significant genes (depleted and enriched) in the**  
908 **CRISPRi-DR model and MAGeCK.**

909 In this Fig, we see all the noise distributions for hits in MAGeCK and the CRISPRi-DR model for all  
910 experiments. The dashed panel is that of RIF D10. The same distribution of noise of hits can be seen in  
911 Fig 7. The trend seen with RIF D10 is present with all the experiments except LEVO D10. We see that the  
912 CRISPRi-DR model is unimodal with a low CV as the mode, whereas MAGeCK shows significant genes  
913 with low average CV values but also a significant amount of genes with high average CV values. LEVO  
914 D10 was left out of this plot due to the low number of hits in either model.

915

916 **S1 Table. Ranking of Select Genes using the CRISPRi-DR model in 1 Day, 5 day and 10 Day pre-**  
917 **depletion of treated libraries.**

918 An extended version of Table 1, where the CRISPRi-DR model is run on each gene for each drug and pre-  
919 depletion day. The coefficient for the slope of concentration dependence ( $\beta_c$ ) is extracted from the  
920 fitted regressions and used to rank the genes in both increasing order (for depletion) and inversely (for  
921 enrichment). Green reflects results consistent with expectations based on knowledge of known gene-  
922 drug interactions.

923

924 **S2 Table. Comparison of significant interactions Identified by CRISPRi-DR and MAGeCK for each drug**  
925 **and pre-depletion day.**

926 For each drug and pre-depletion day, both CRISPRi-DR and MAGeCK are run on data. MAGeCK is run  
927 separately for each concentration and the overall significant interactions are determined as the union of  
928 the individual runs. CRISPRi-DR is run once using data from all three concentrations (and sgRNA  
929 strengths) together. The comparison of the significant interactions identified by the models is evaluated  
930 using true positives, true negatives, false positives and false negatives. The results from MAGeCK are  
931 used as the “ground truth” against which the other model's results are compared. Cells with red font in  
932 the “tp” column represent low overlaps between the interactions found by the two models, and cell  
933 with red font in the “Number of ...” columns highlight low number of interactions found in the relative  
934 model.

935

936 **S3 Table. Matrices for comparison of significant interactions Identified by CRISPRi-DR and MAGeCK for**  
937 **each drug and pre-depletion day.**

938 The table presents the results of CRISPRi-DR and MAGeCK analyses for different drugs and pre-depletion  
939 days. Significant interactions are compared in matrix form. Cells with red font indicate low overlaps  
940 between the interactions found by the two models, while cells with green font represent high overlaps.

941

942 **S1 File. Evaluating performance differences between CRISPRi-DR and MAGeCK using a simulated**  
943 **sgRNA barcodes.**

944 To better understand the differences in performance between CRISPRi-DR and MAGeCK, and to evaluate  
945 the sensitivity of these methods to different sources of noise, we developed a simulation model to  
946 generate artificial datasets of sgRNA barcode counts. In this experiment, we used the same set of  
947 ~99,000 sgRNAs and empirical measurements of sgRNA strengths for genes in the *Mtb* genome as in the

948 CRISPRi library in the paper by (Li, Poulton et al. 2022), and simulated exposure to a virtual inhibitor over  
949 4 concentrations (1 $\mu$ M, 2 $\mu$ M, 4 $\mu$ M, and 8 $\mu$ M), 3 replicates each. Our objective was to quantify how  
950 much noise in the counts, both within concentrations and between concentrations, affects the precision  
951 and recall of each method.
